# Supplementary material for: Cross-country inequalities and trends in the global burden of COVID- 19-induced Guillain-Barré syndrome, 2020 to 2021: a population-based study
Source: Research Square preprint supplement (doi:10.21203/rs.3.rs-6734070/v1), 2025-07-01
Supplement: Supplementary file 1 [file 3c1fc8f28ac584bd77d938f7.docx]

# Supplementary materials

**FigureS1**.**(A)** Age-standardized prevalence rates of COVID-19-Induced GBS in 2021 globally and by GBD regions (per 100,000 people) and percentage changes from 2020 to 2021.**(B)** Age-standardized YLDs rates of COVID-19-Induced GBS in 2021 globally and by GBD regions (per 100,000 people) and percentage changes from 2020 to 2021
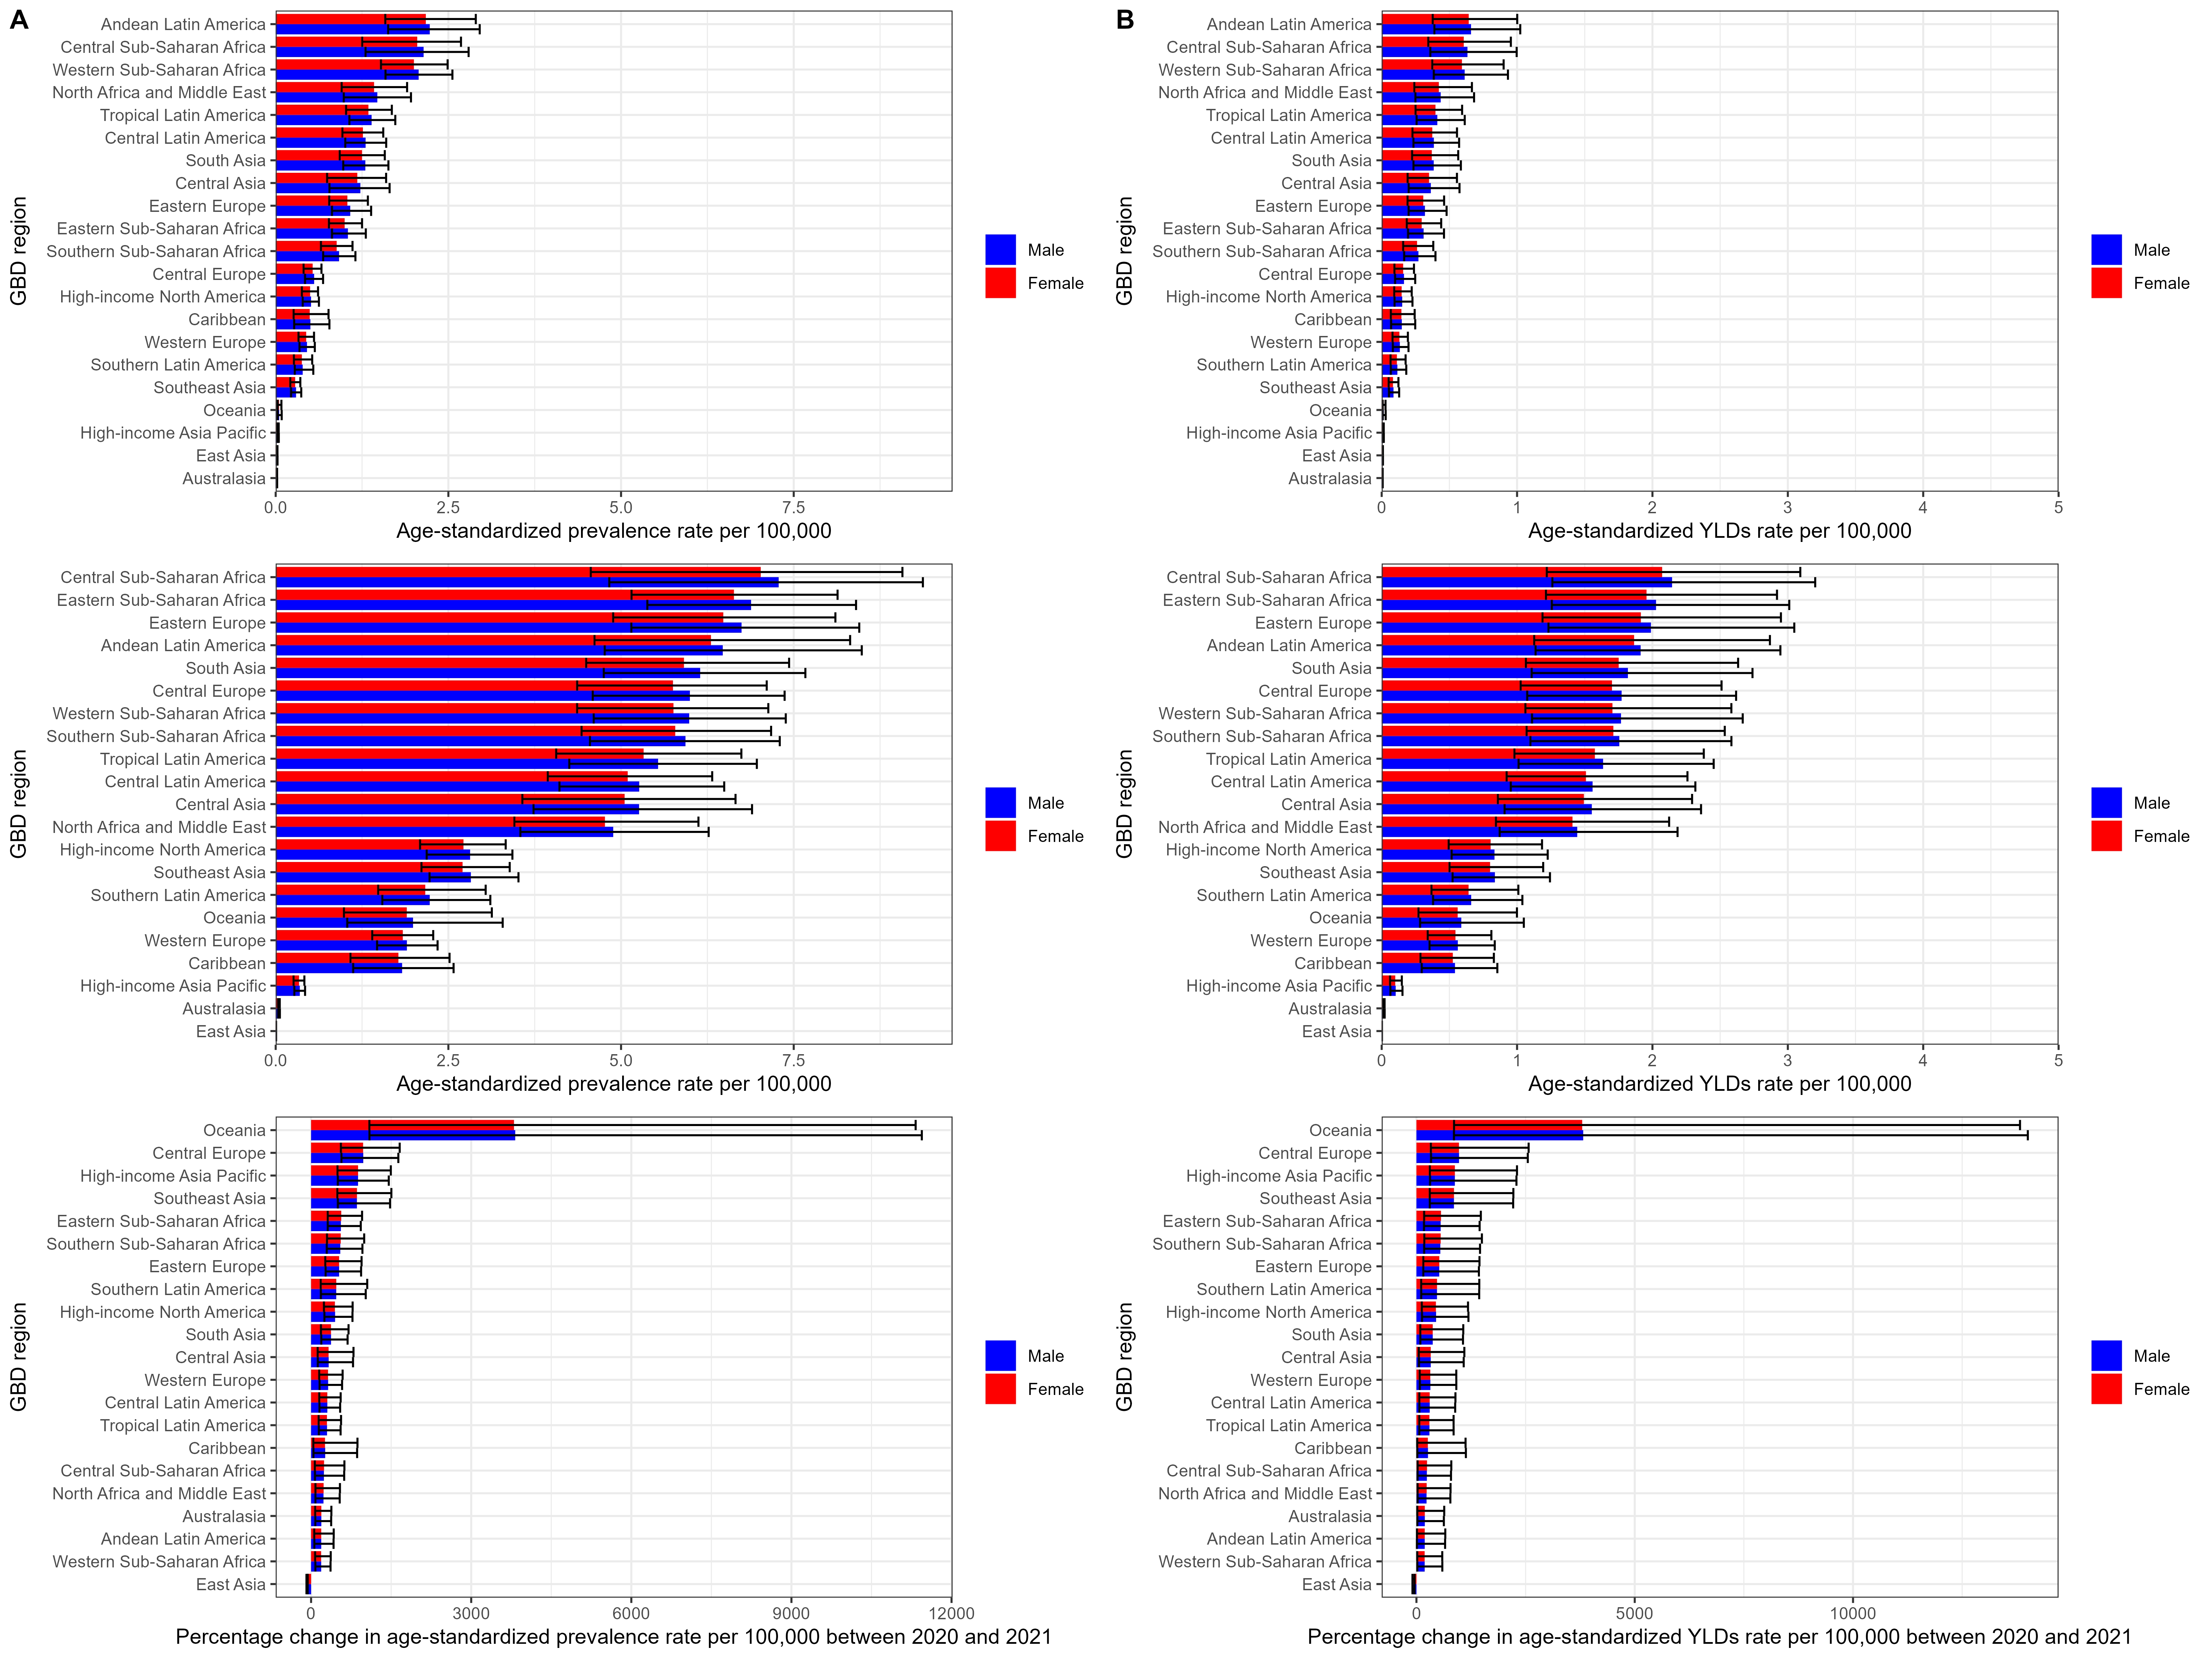


**FigureS2**. **Age-Standardized YLDs Rates by SDI in Global Disease Burden Regions and Countries from 2020 to 2021**. (A) Age-Standardized YLDs Rates by SDI in Global Disease Burden Regions from 2020 to 2021. (B) Age-Standardized YLDs Rates by SDI in Different countries.
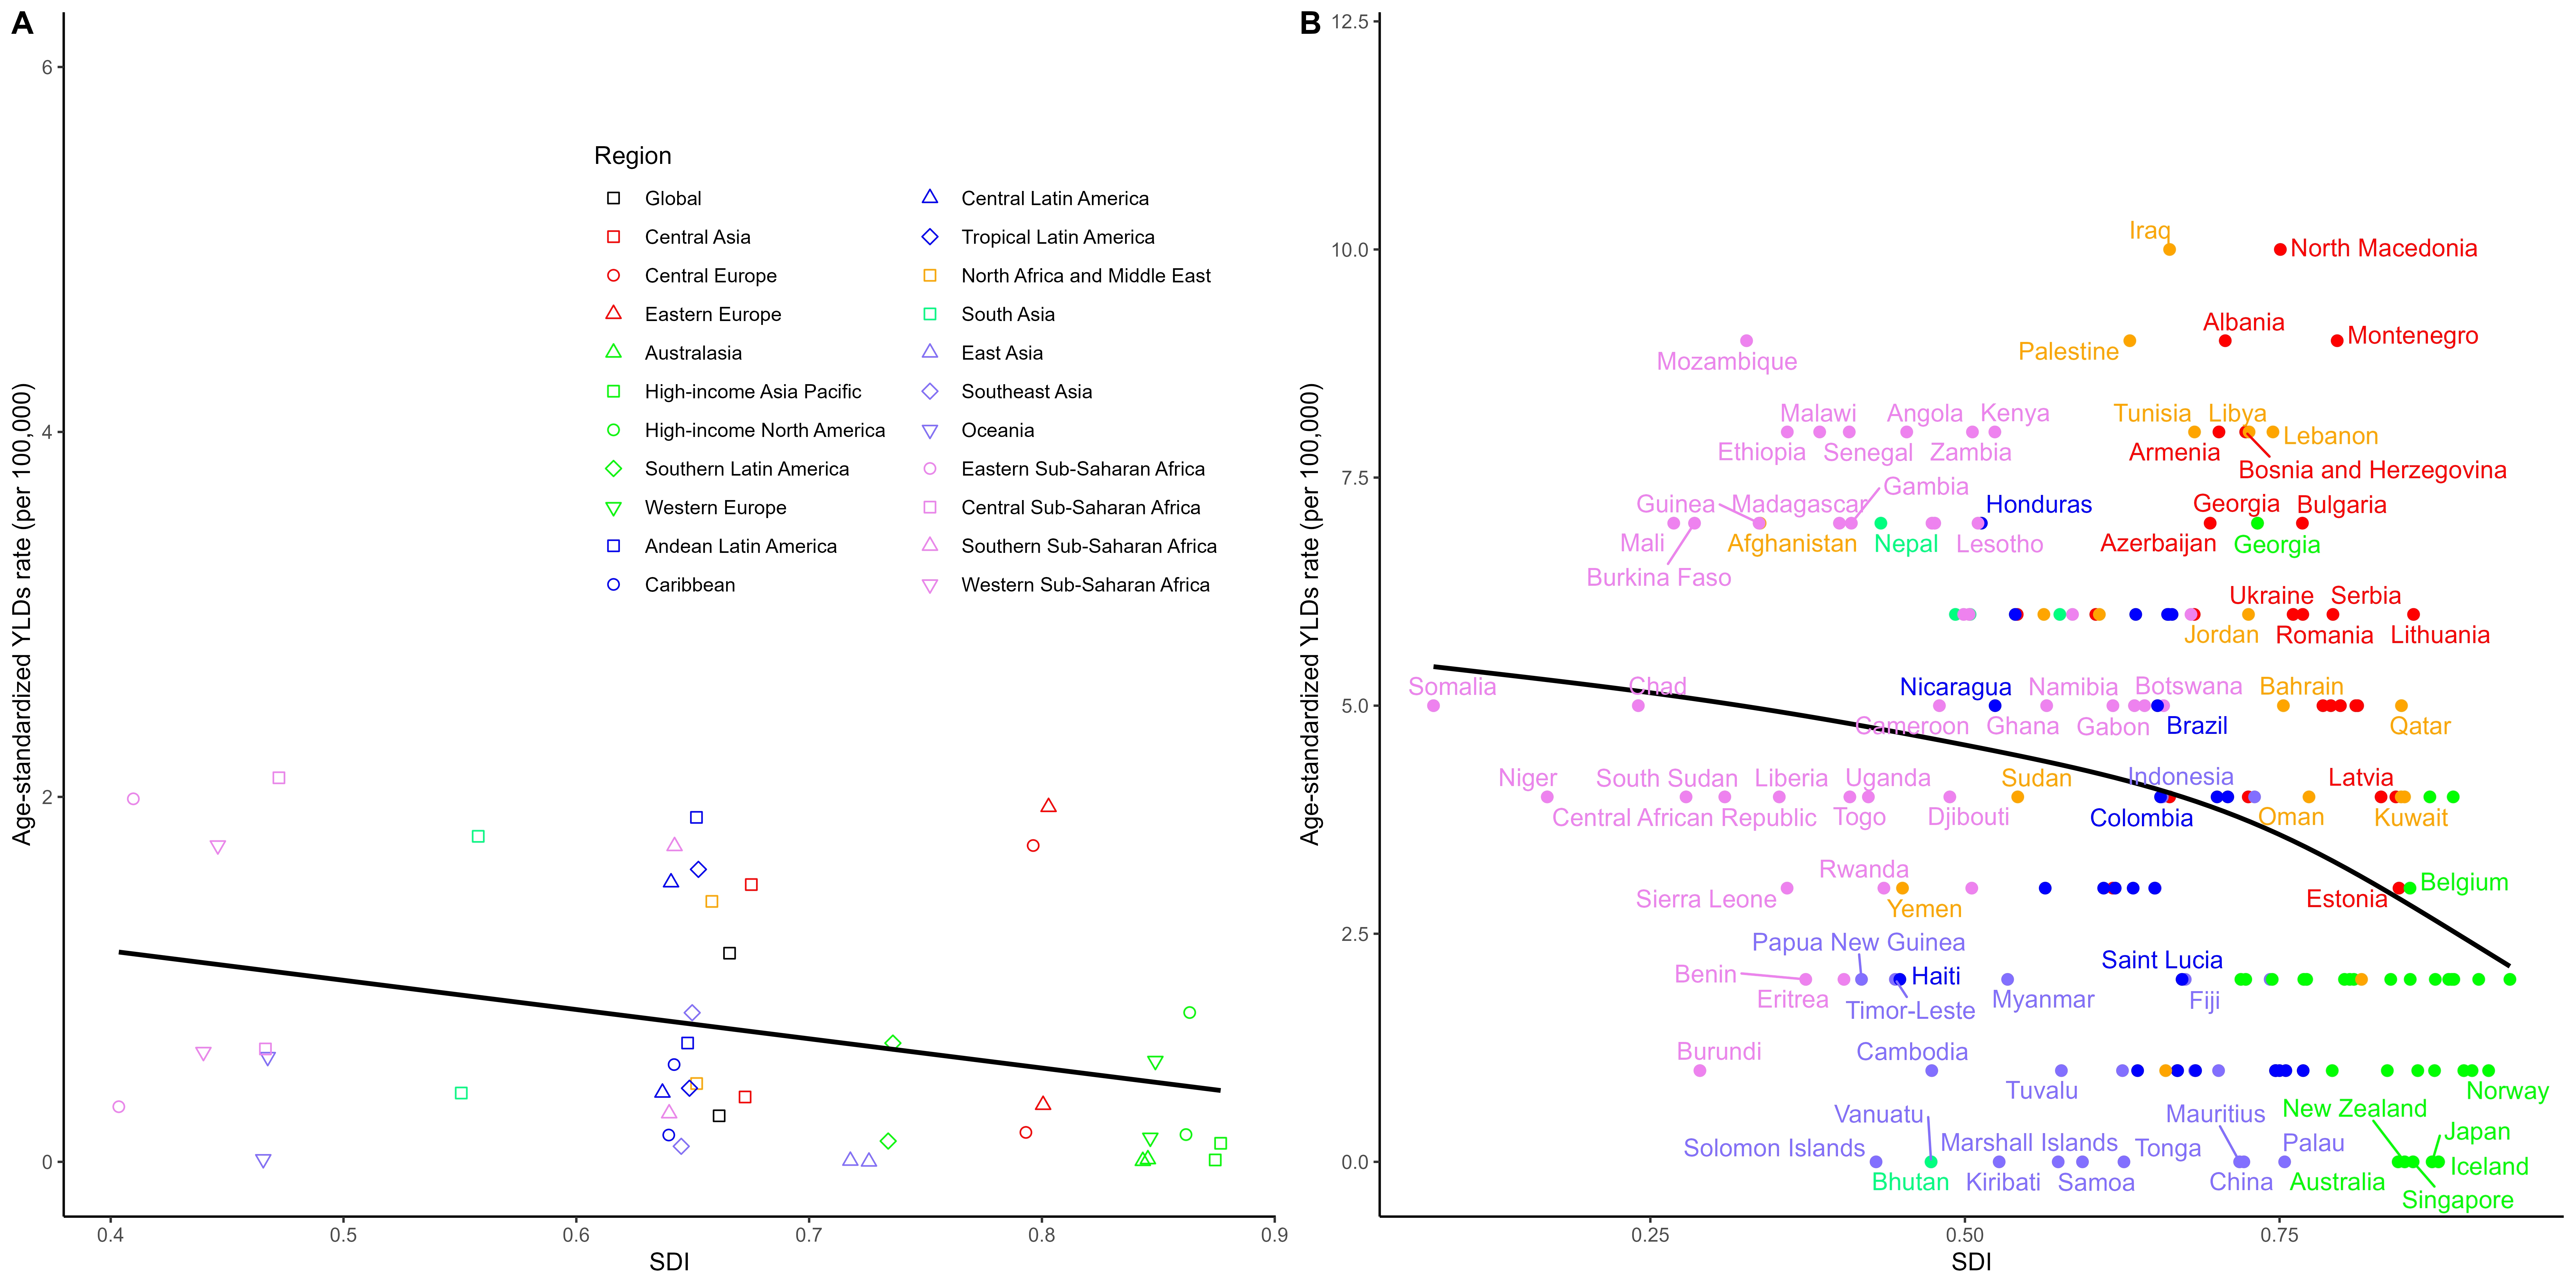


**FigureS3**. **Frontier Analysis of Age-Standardized prevalence for COVID-19-Induced GBS Based on SDI**. (A) Frontier Analysis of SDI and Age-Standardized prevalence rate from 2020 to 2021. (B) Frontier Analysis of SDI and Age-Standardized prevalence rate in Different Countries in 2021.
